# Supplementary material
Source: Springer Nature journal article supplement (https://www.springermedizin.de/resource/supplementary/12936_2006_328_MOESM1_ESM.pdf/9547550)
Supplement: MOESM1 [file 9547550]

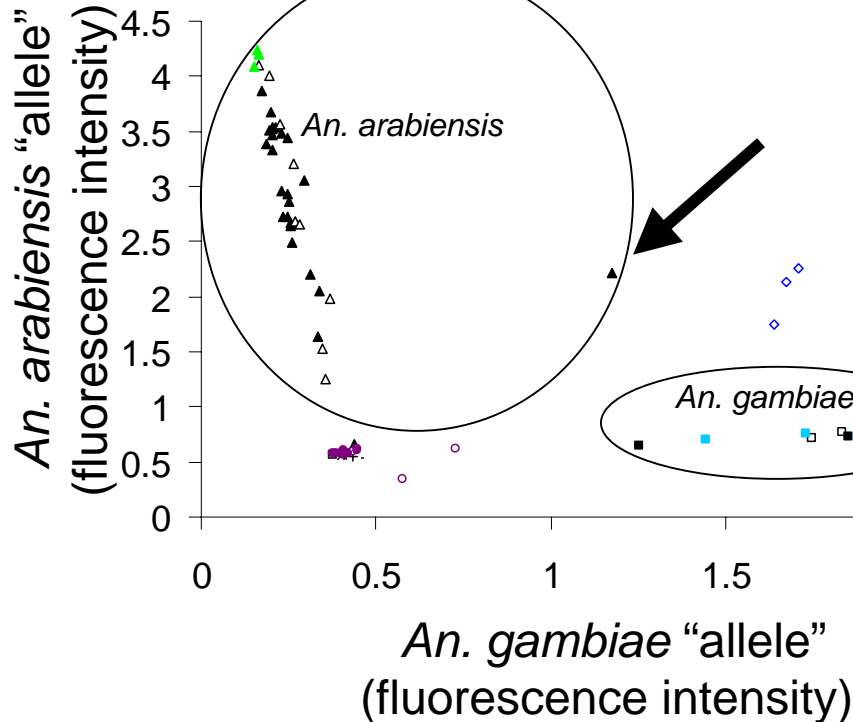

- *An. gambiae* wild type
- *An. gambiae* KISUMU
- *An. gambiae* RSP
- *An. gambiae* ZANU
- ▲ *An. arabiensis* wild type
- △ *An. arabiensis* MR4
- *An. gambiae* control
- ▲ *An. arabiensis* control
- × *Ae. albopictus*
- + *Oc. triseriatus*
- ◇ Plasmid control
- Internal control
- Blank well control
